# Supplementary material for: Burkitt’s lymphoma: incidence among IICC-3 risk-assessed countries emphasizing the Middle East with new data from Iraqi Kurdistan
Source: Research Square preprint supplement (doi:10.21203/rs.3.rs-1616455/v1), 2022-05-13
Supplement: Supplementary file 1 [file 10548a47b5a5715bc35a1a9f.docx]

Table 4. Serological testing among 516 non-oncology

outpatients for Ig Epstein-Barr virus viral capsid antigen.

Results are tabulated by age and as a total.

| Age (years) | No. tested | No. positive | Fraction  positive |
| --- | --- | --- | --- |
| 0.25-0.99* | 20 | 9 | 0.45 |
| 1 | 34 | 16 | 0.47 |
| 2 | 33 | 17 | 0.52 |
| 3 | 19 | 13 | 0.68 |
| 4 | 27 | 17 | 0.63 |
| 5 | 25 | 21 | 0.84 |
| 6 | 35 | 24 | 0.69 |
| 7 | 30 | 23 | 0.77 |
| 8 | 26 | 20 | 0.77 |
| 9 | 13 | 9 | 0.69 |
| 10-14 | 74 | 65 | 0.88 |
| 15-19 | 33 | 32 | 0.97 |
| 20-24 | 22 | 16 | 0.73 |
| 25-29 | 22 | 22 | 1.00 |
| 30-34 | 15 | 14 | 0.93 |
| 35-39 | 19 | 17 | 0.89 |
| 40-49 | 29 | 29 | 1.00 |
| 50-59 | 25 | 23 | 0.92 |
| 60-69 | 14 | 14 | 1.00 |
| Total | 516 | 401 | 0.78 |

*Under one year of age, subjects less than three months old

were not reported, because maternal antibodies produced

passive IgG positive and IgM negative reactions. Three

such subjects were found at three and 12 days and two

months.
