# Supplementary material for: Burkitt’s lymphoma: incidence among IICC-3 risk-assessed countries emphasizing the Middle East with new data from Iraqi Kurdistan
Source: Research Square preprint supplement (doi:10.21203/rs.3.rs-1616455/v1), 2022-05-13
Supplement: Supplementary file 2 [file 7274964746546c2093925323.docx]

Table 1. Characteristics of patients diagnosed with Burkitt

lymphoma in the years 2010 through 2020 in Iraqi Kurdistan.

| Characteristics | Burkitt lymphomas |
| --- | --- |
| No. of patients | 74 |
| Male, no. (%) | 65 (88%) |
| Age, yrs: range, median | 1.5-56, 5.5 (IQR 4-12) |
| 0-4, no. (%) | 28 (38%) |
| 5-9, no. (%) | 22 (30%) |
| 10-14, no. (%) | 10 (14%) |
| 15-19, no. (%) | 2 (3%) |
| ≥ 20, no. (%) | 12 (16%) |
| Immunosuppressed | 1 (HIV, hemophilia) |
| BL presenting site, no. (%) |  |
| Abdomen/intestine | 52 (70%) |
| Cervical LN | 10 (14%) |
| Tonsil | 4 (5%) |
| Mediastinum | 1 (1%) |
| Kidney | 2 (3%) |
| Breast | 1 (1%) |
| No information | 2 (3%) |

Abbreviations: IQR, interquartile range; LN, lymph node.
