# Supplementary material for: Burkitt’s lymphoma: incidence among IICC-3 risk-assessed countries emphasizing the Middle East with new data from Iraqi Kurdistan
Source: Research Square preprint supplement (doi:10.21203/rs.3.rs-1616455/v1), 2022-05-13
Supplement: Supplementary file 3 [file a1a19eeb9b58362ea8a89261.docx]

Table 3. Comparison of regional Burkitt's lymphoma. Age-specific incidence rates per million 0-19 year old residents are compared together with the ratio of children to adults, Epstein-Barr virus serology, and frequency of tissue EBV latency.

| Country | ASIR  0-19 year-old | Ratio  Child:adult | HDI | sEBV | tEBV |
| --- | --- | --- | --- | --- | --- |
| Sulaimani | 6.2 (4.7-7.7) | 1 : 0.19 | .674 | 0.92 LC | 0.83 |
| Egypt | 5.2 (4.2-6.2) | 1 : 0.05 | .707 | na | 0.73 |
| Algeria | 1.0 (0.6-1.4) | na | .748 | 0.83 C | 0.88 |
| Morocco | 5.0 (3.7-6.3) | na | .686 | na | na |
| Jordan | 3.7 (3.1-4.3) | 1 : 0.13 | .729 | 0.98 C | na |
| Israel all races | 5.0 (4.3-5.7) | na | .919 | 0.87 AYD | 0.34 |
| Saudi Arabia | 2.8 (2.3-3.3) | na | .854 | 0.98 C | na |
| Turkey | 3.5 (3.0-4.0) | na | .820 | 0.82 C | 0.93 |
| S. Africa all races | 1.7 (1.5-1.9) | 1 : 2.78 | .709 | 0.95 EBV  0.78 HIV+ | na |
| Uganda | 21.6 (19.4-23.8) | 1 : 0.21 | .544 | 0.96 EC | >0.95 |
| Cameroon | 40.0 (32.9-47.1) | 1 : 0.41 | .563 | 0.97 EC | >0.95 |
| Canada | 2.5 (2.3-2.7) | 1 : 2.78 | .929 | 0.95 AYD | na |
| US all races | 2.4 (2.3-2.5) | 1 : 3.85 | .926 | 0.83 AYD | 0.30 |
| UK | 2.3 (2.1-2.5) | 1 : 4.78 | .932 | 0.85 AYD | 0.10 |
| Germany-West | 2.8 (2.4-3.2) | na | .947 | 0.95 AYD | na |
| France | 4.3 (3.7-4.9) | na | .901 | 0.82 AYD | na |
| Italy | 4.0 (3.5-4.5) | 1 : 0.20 | .892 | 0.65 AYD | 0.62 |
| Spain | 4.8 (4.2-5.5) | na | .904 | 0.99 AYD | na |
| Japan | 1.4 (1.1-1.7) | 1 : 2.94 | .919 | 0.59 AYD | 0.29 |
| Korea | 2.1 (1.9-2.3) | Ped<Adult | .916 | 0.87 AYD | 0.00 |
| China | 0.4 (0.3-0.5) | 1 : 0.55 | .761 | 0.80 EC | 0.32 |
| Thailand | 0.8 (0.6-1.0) | Ped>Adult | .777 | 0.95 EC | na |
| India | 0.5 (0.4-0.6) | Ped>Adult | .645 | 0.90 EC | na |

Abbreviations: na, not available; ASIR, age-specific incidence rate with 95% confidence interval (95% CI); HDI, human development index [from the WHO website]; HIV, human immunodeficiency virus; Ped, pediatric; EBV, Epstein-Barr virus; sEBV, population serological EBV frequency; C, childhood infection, not further specified;EC, early childhood infection; LC, late childhood infection; AYD, adolescent and young adult infection; tEBV lymphoma tissue EBER frequency.
