# Supplementary material for: Burkitt’s lymphoma: incidence among IICC-3 risk-assessed countries emphasizing the Middle East with new data from Iraqi Kurdistan
Source: Research Square preprint supplement (doi:10.21203/rs.3.rs-1616455/v1), 2022-05-13
Supplement: Supplementary file 4 [file cb7301d764c7b3793d56d706.docx]

Table 2. Burkitt’s lymphoma. The table lists the age-specific incidence rate per million children and the distribution of patients in the 0-4-, 5-14-, and 15–19-year-old age ranges. Data from Sulaimani is local. Data from the other countries are compiled from the tables of diagnostic subgroups in the WHO IICC-3 website [https://iirc.iarc.fr/ results/comparative.php].

| Country | Years data  collected | Cases  No. | ASIR (95% CI)  per million children, 0-19 yrs old | Male | Age distribution, years | | |
| --- | --- | --- | --- | --- | --- | --- | --- |
| 0-4 | 5-14 | 15-19 |
| Sulaimani | 2010-20 | 62 | 6.2 (4.7-7.7) | 0.89 | 0.45 | 0.52 | 0.03 |
| Egypt | 1996-2010 | 97 | 5.2 (4.2-6.2) | 0.73 | 0.47 | 0.46 | 0.07 |
| Algeria | 1996-2014 | 23 | 1.0 (0.6-1.4) | 0.81 | 0.43 | 0.41 | 0.15 |
| Morocco | 2005-2012 | 60 | 5.0 (3.7-6.3) | 0.82 | 0.24 | 0.62 | 0.14 |
| Jordan | 2000-2012 | 129 | 3.7 (3.1-4.3) | 0.78 | 0.27 | 0.64 | 0.09 |
| Israel-Jew | 1990-2012 | 195 | 5.0 (4.3-5.7) | 0.74 | 0.32 | 0.52 | 0.15 |
| Israel-non Jew | 1990-2012 | 69 | 4.8 (3.7-5.9) | 0.77 | 0.23 | 0.63 | 0.14 |
| Saudi Arabia | 1994-2012 | 121 | 2.8 (2.3-3.3) | 0.68 | 0.35 | 0.53 | 0.13 |
| Turkey | 1992-2012 | 180 | 3.5 (3.0-4.0) | 0.70 | 0.28 | 0.64 | 0.08 |
| S. Africa-black | 1998-2012 | 252 | 1.4 (1.2-1.6) | 0.75 | 0.50 | 0.50 | na |
| S Africa-white | 1998-2012 | 34 | 2.8 (1.9-3.7) | 0.75 | 0.19 | 0.81 | na |
| Uganda | 1996-2013 | 376 | 21.6 (19.4-23.8) | 0.56 | 0.20 | 0.76 | 0.04 |
| Cameroon | 2004-2006 | 122 | 40.0 (32.9-47.1) | 0.58 | 0.23 | 0.64 | 0.07 |
| Canada | 1992-2013 | 408 | 2.5 (2.3-2.7) | 0.80 | 0.18 | 0.59 | 0.22 |
| US-black | 1998-2012 | 276 | 1.4 (1.2-1.6) | 0.74 | 0.17 | 0.63 | 0.20 |
| US-white | 1998-2012 | 2072 | 2.8 (2.7-2.9) | 0.80 | 0.16 | 0.64 | 0.23 |
| UK | 2000-2011 | 419 | 2.3 (2.1-2.5) | 0.79 | 0.21 | 0.62 | 0.17 |
| Germany-West | 1994-2012 | 198 | 2.8 (2.4-3.2) | 0.82 | 0.14 | 0.67 | 0.18 |
| France | 1993-2012 | 182 | 4.3 (3.7-4.9) | 0.81 | 0.19 | 0.68 | 0.19 |
| Italy | 1992-2013 | 224 | 4.0 (3.5-4.5) | 0.76 | 0.14 | 0.68 | 0.24 |
| Spain | 1990-2013 | 210 | 4.8 (4.2-5.5) | 0.81 | 0.25 | 0.59 | 0.19 |
| Japan | 1990-2013 | 110 | 1.4 (1.1-1.7) | 0.85 | 0.26 | 0.66 | 0.08 |
| Korea | 1999-2012 | 351 | 2.1 (1.9-2.3) | 0.80 | 0.28 | 0.59 | 0.13 |
| China | 1990-2013 | 33 | 0.4 (0.3-0.5) | 0.78 | 0.33 | 0.61 | 0.06 |
| Thailand | 1993-2013 | 41 | 0.8 (0.6-1.0) | 0.81 | 0.42 | 0.45 | 0.13 |
| India | 1990-2013 | 109 | 0.5 (0.4-0.6) | 0.70 | 0.32 | 0.63 | 0.05 |

Abbreviations: ASIR, age-specific incidence rate. 95% CI, 95% confidence interval.
